# Supplementary material
Source: MDPI journal article supplement (https://www.mdpi.com/2076-3417/13/11/6719)
Supplement: s1 [file s1]

**Table S1****Supplementary material**

Soft tissue Biopsy specific Diagnosis list

| DIAGNOSIS                    | Number (N) | Percentage % |
|------------------------------|------------|--------------|
| FIBROMA                      | 220        | 31.80%       |
| LICHEN PLANUS                | 88         | 12%          |
| MUCOCELE                     | 87         | 12%          |
| SCC                          | 35         | 5%           |
| PEMPHIGUS VULGARIS           | 26         | 3.70%        |
| PYOGENIC GRANULOMA           | 19         | 2.70%        |
| PAPILLOMA                    | 16         | 2.30%        |
| MELANOITC MACULE             | 15         | 2.10%        |
| VASCULITIS MALFORMATION      | 14         | 2%           |
| GIANT CALL GRANULOMA         | 14         | 2%           |
| LEUKOPLAKIA                  | 13         | 1.80%        |
| DYSPLASIA                    | 12         | 1.70%        |
| RADICULAR CYST               | 10         | 1.40%        |
| SJOGREN                      | 9          | 1.30%        |
| AMALGAM TATOO                | 9          | 1.30%        |
| GRANULOMA LYMPHOMA           | 7          | 1%           |
| HYOERKERATOTIC               | 6          | 0.86%        |
| BENIGN PAPILLOMATOUS LESION  | 6          | 0.86%        |
| EPULIS FISSURATUM            | 5          | 0.72%        |
| NASOPLATINE CYST             | 5          | 0.72%        |
| CANDIDA                      | 4          | 0.57%        |
| HEMANGIOMA                   | 4          | 0.57%        |
| VERRUCOS                     | 4          | 0.57%        |
| CENTRAL GIANT CELL GRANULOMA | 4          | 0.57%        |
| TRAUMATIC ULCERATION         | 4          | 0.57%        |
| FOCAL EPITHELIAL             | 3          | 0.43%        |
| ENLARGED FOLLICLE            | 3          | 0.43%        |
| SQUAMOUS MUCOSA              | 3          | 0.43%        |
| PERIPHERAL OSSIFYING FIBROMA | 3          | 0.43%        |
| GRANULAR CELL TUMOR          | 3          | 0.43%        |
| FORDYCE GRANULES             | 2          | 0.20%        |
| GRANULOMATOSIS               | 2          | 0.20%        |
| MINOR SALIVARY GLAND         | 2          | 0.20%        |
| SOLAR CHEILITIS              | 2          | 0.20%        |
| HAMARTOMA                    | 2          | 0.20%        |
| FOREIGN BODY                 | 2          | 0.20%        |
| BLUE NEVUS                   | 1          | 0.14%        |
| SCAR TISSUE                  | 1          | 0.14%        |
| GAINT CELL TUMOR             | 1          | 0.14%        |

|                                 |   |       |
|---------------------------------|---|-------|
| ULCERRATED POLYPOID GRNULATION  | 1 | 0.14% |
| SCLERODERMA                     | 1 | 0.14% |
| VERRUCOUS HYPERPLASIA           | 1 | 0.14% |
| MILD LICHENOID                  | 1 | 0.14% |
| CHEILITIS GLANDULARIS           | 1 | 0.14% |
| ODONTOGENIC KERATOCYST          | 1 | 0.14% |
| EWING SARCOMA                   | 1 | 0.14% |
| WHITE SPONGE NEVUS              | 1 | 0.14% |
| PLASMA CELL MYELOMA             | 1 | 0.14% |
| OROFACIAL GRANULATOSIS          | 1 | 0.14% |
| DENTAL SAC                      | 1 | 0.14% |
| ADENOMATOID HYPERPLASIA         | 1 | 0.14% |
| MASSONS TUMOR                   | 1 | 0.14% |
| PERIPHERAL GIANT CELL GRANULOMA | 1 | 0.14% |
| RANULA                          | 1 | 0.14% |
| FRICTIONAL KERATOSIS            | 1 | 0.14% |
| ORGANIZED THROMBUS              | 1 | 0.14% |
| ADENOID CYSTIC CARCINOMA        | 1 | 0.14% |
| MONONUCLEAR SUBEPITHELIAL       | 1 | 0.14% |
| COMPOUND ODONTOMA               | 1 | 0.14% |
| EOSINOPHILIC GRANULOMA          | 1 | 0.14% |
| INFLAMMTION                     | 1 | 0.14% |
| CHRONIC SCLEROSING SIALADENITIS | 1 | 0.14% |
| PALISADED ENCAPSULATED NEUROMA  | 1 | 0.14% |
| Oher                            | 1 | 0.14% |
